# Supplementary material for: A facile in situ interfacial construction strategy of hierarchically distributed mixed-metal layered hydroxide/cellulose membranes towards efficient wastewater purification
Source: Royal Society of Chemistry journal article supplement (doi:10.1039/d3gc02339g), 2023-01-01
Supplement: d3gc02339g1.pdf [file d3gc02339g1.pdf]

## Electronic Supplementary Material

### **A facile in-situ interfacial construction strategy of hierarchically distributed mixed-metal layered hydroxides/cellulose membrane towards efficient wastewater purification**

Shuo Zhang,<sup>‡a</sup> Liping Shu,<sup>‡b</sup> Haohang Fang,<sup>a</sup> Weizhi Zhu,<sup>a</sup> Jianping Sun,<sup>a</sup> Fang Yang,<sup>b</sup> Yiqiang Wu,<sup>c</sup> Shaohong Shi<sup>\*a</sup> and Fangchao Cheng<sup>\*a,c</sup>

<sup>a</sup> State Key Laboratory of Featured Metal Materials and Life-cycle Safety for Composite Structures, School of Resources, Environment and Materials, Guangxi University, Nanning 530004, China

<sup>b</sup> Guangxi Key Laboratory of Natural Polymer Chemistry and Physics, College of Chemistry and Materials, Nanning Normal University, Nanning 530001, China

<sup>c</sup> College of Material Science and Engineering, Central South University of Forestry and Technology, Changsha 410004, China

<sup>‡</sup> These authors contributed equally to this work.

\* Email of corresponding author: shshichn@gxu.edu.cn; fangchaocheng@gxu.edu.cn

#### **The Content of Supporting Information:**

Total number of pages: 16

Total number of figures: 9

Total number of tables: 4

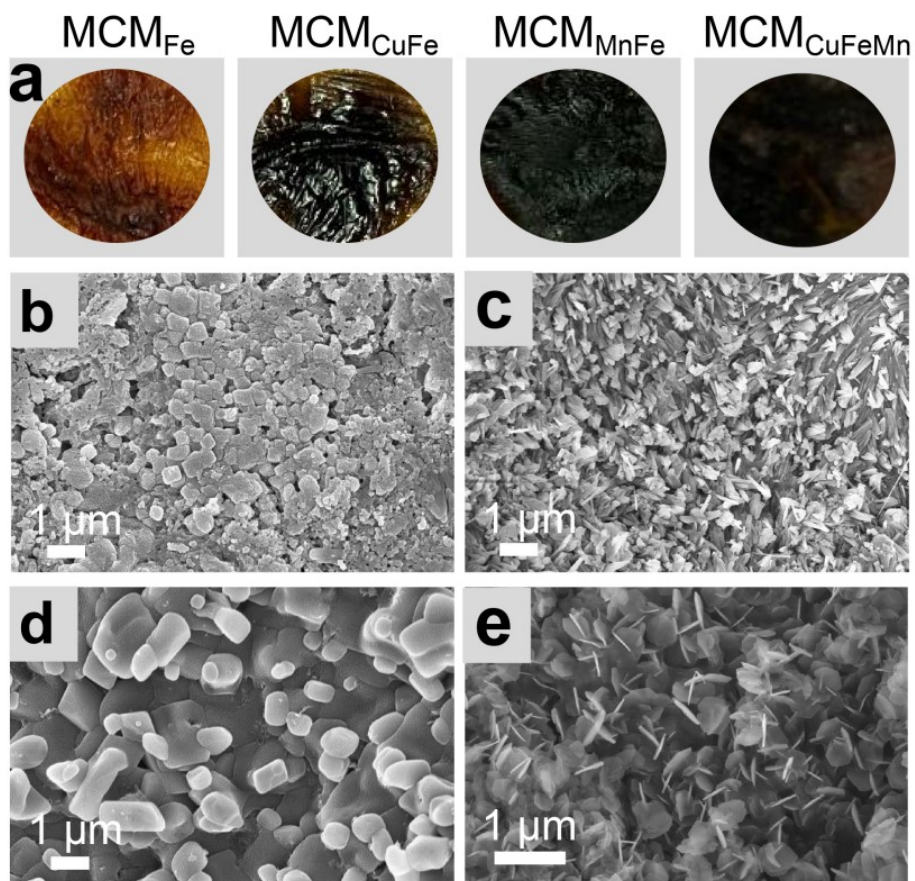

Fig. S1. The digital images of  $\text{MCM}_{\text{Fe}}$ ,  $\text{MCM}_{\text{CuFe}}$ ,  $\text{MCM}_{\text{MnFe}}$  and  $\text{MCM}_{\text{CuFeMn}}$  catalytic membranes (a); SEM images of  $\text{MCM}_{\text{Fe}}$  (b),  $\text{MCM}_{\text{CuFe}}$  (c),  $\text{MCM}_{\text{MnFe}}$  (d), and  $\text{MCM}_{\text{CuFeMn}}$  catalytic membranes (e).

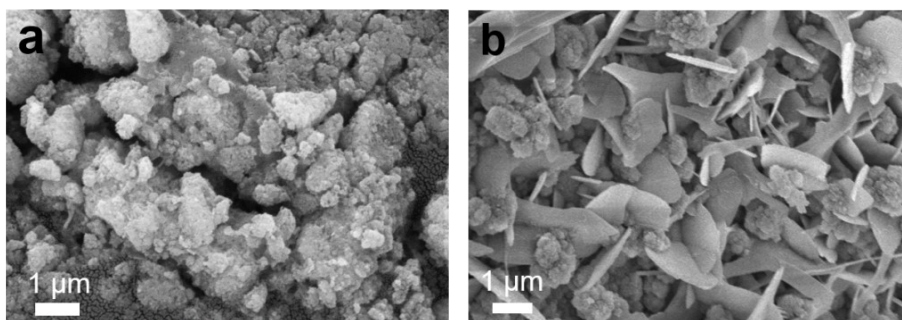

Fig. S2. SEM images of CuFeMn catalysts (a), and catalytic membrane with CuFeMn proportion of 9:3:9 (MCM<sub>939</sub>) (b).

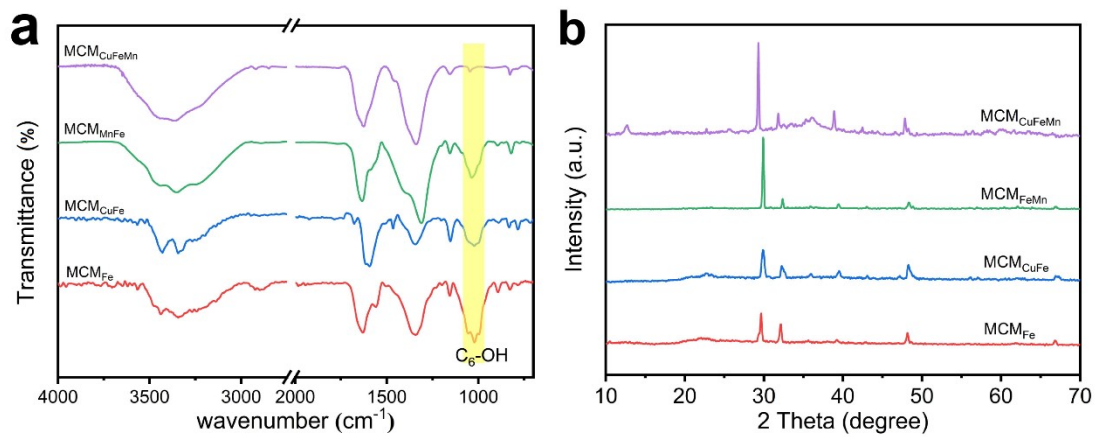

Fig. S3. The FT-IR spectra of MCM<sub>Fe</sub>, MCM<sub>CuFe</sub>, MCM<sub>MnFe</sub> and MCM<sub>CuFeMn</sub> catalytic membranes (a); The XRD patterns of MCM<sub>Fe</sub>, MCM<sub>CuFe</sub>, MCM<sub>MnFe</sub> and MCM<sub>CuFeMn</sub> catalytic membranes (b).

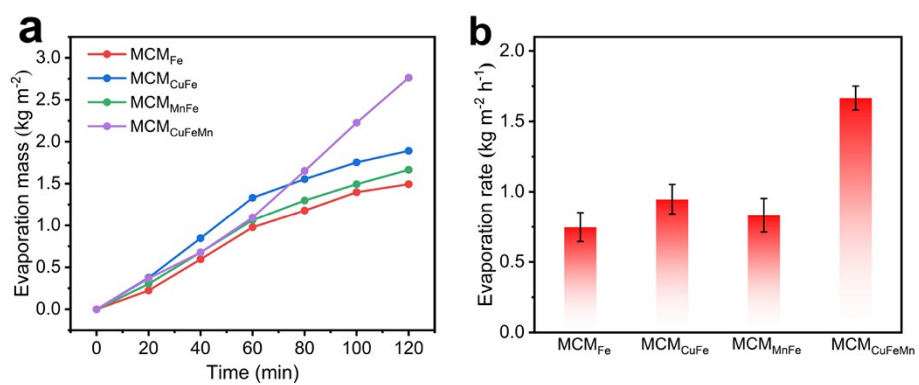

Fig. S4. Water evaporation mass (a) and evaporation rate of MCM<sub>Fe</sub>, MCM<sub>CuFe</sub>, MCM<sub>MnFe</sub> and MCM<sub>CuFeMn</sub> catalytic membranes (b).

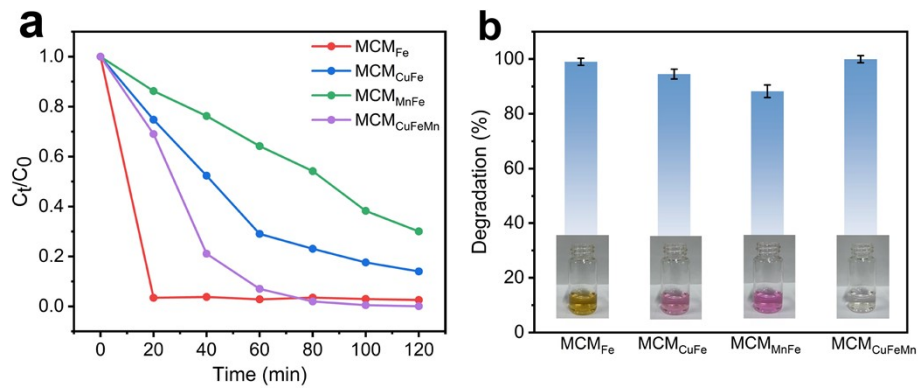

Fig. S5. The residual ratios ( $C_t/C_0$ ) (a) and the corresponding degradation efficiency of RhB after treatment with  $MCM_{Fe}$ ,  $MCM_{CuFe}$ ,  $MCM_{MnFe}$  and  $MCM_{CuFeMn}$  catalytic membranes (the inset showed the digital images of solution after photo-Fenton reaction) (b).

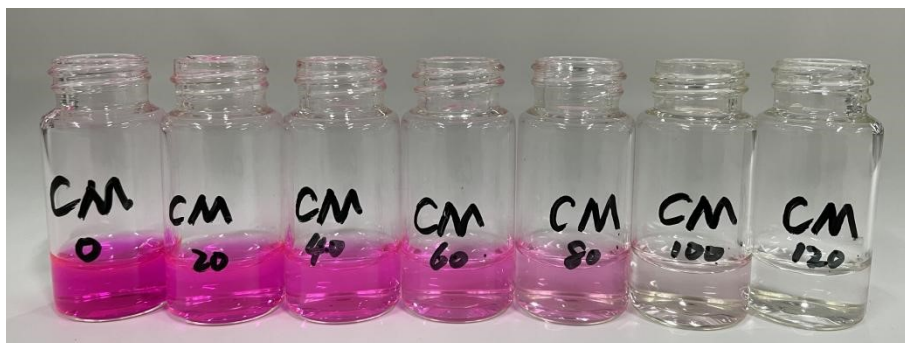

Fig. S6. Digital image of RhB solution after photo-Fenton reaction with MCM<sub>535</sub> within 120 min.

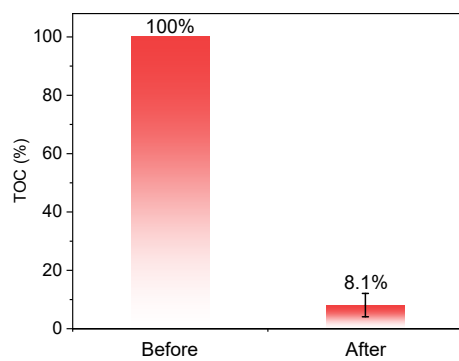

Fig. S7. The Total Organic Carbon (TOC) of MCM<sub>535</sub> in 200 mg/L RhB solution before and after photo-Fenton reaction.



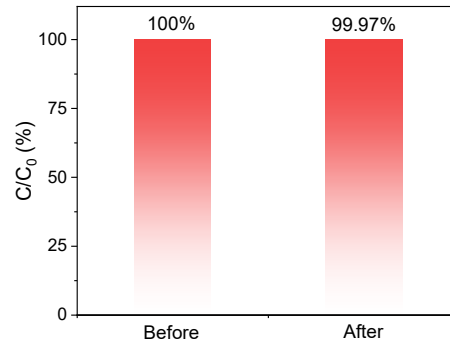

Fig. S8. The adsorption behavior of MCM<sub>535</sub> in 200 mg/L RhB solution before and after a treatment of 30 minutes.

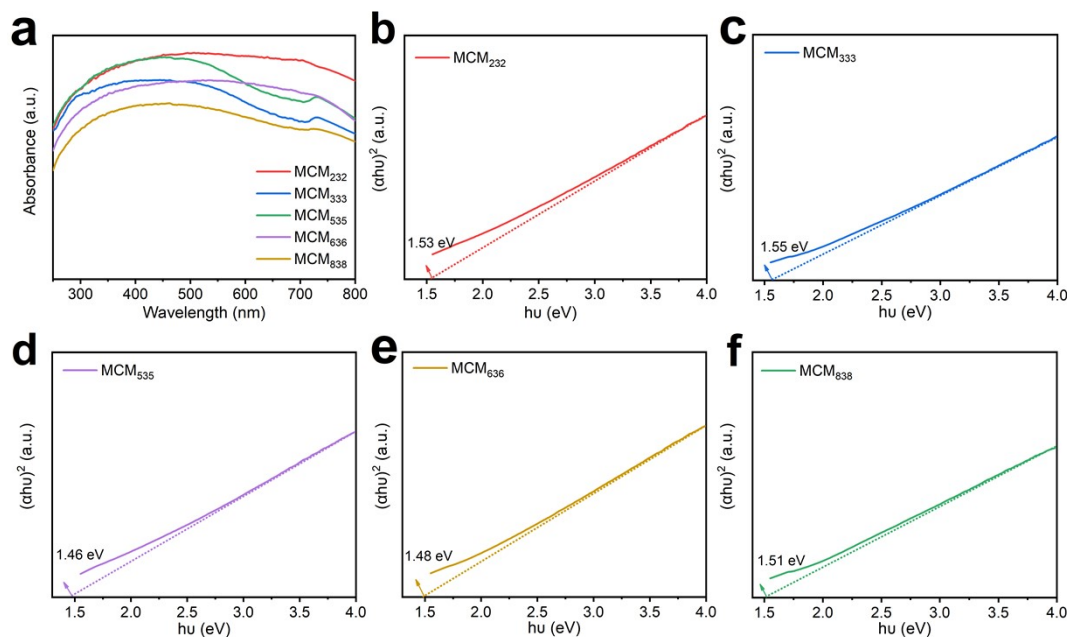

Fig. S9. Optical absorption spectra of catalytic membranes with different CuFeMn proportions (a); Estimated band-gap energy of MCM<sub>232</sub> (b), MCM<sub>333</sub> (c), MCM<sub>535</sub> (d), MCM<sub>636</sub> (e), and MCM<sub>838</sub> catalytic membranes (f).

The UV-Vis diffuse reflectance spectra of MCM<sub>232</sub>, MCM<sub>333</sub>, MCM<sub>535</sub>, MCM<sub>636</sub>, and MCM<sub>838</sub> were tested and converted into their absorption spectra according to the Kubelka Munk (K-M) method (Fig. S6a). The band gaps of different catalysts were determined by the following Equ. (1):

$$\alpha h\nu = A(h\nu - E_g)^n \quad (1)$$

Where,  $\alpha$ ,  $h$ ,  $A$ , and  $E_g$  are light absorption coefficients, photon energy, proportional constants, and band-gap energy, respectively;  $n$  depends on the optical transition type of the semiconductor ( $n=1/2$ , direct absorption;  $n=2$ , indirect absorption). CuFeMn metal hydroxides are direct band gap semiconductors, so  $n=1/2$ , so the absorption band gap is determined by  $(\alpha h\nu)^2$  and  $h\nu$ . It can be calculated that the  $E_g$  estimates for MCM<sub>232</sub>, MCM<sub>333</sub>, MCM<sub>535</sub>, MCM<sub>636</sub>, and MCM<sub>838</sub> were 1.53 eV, 1.55 eV, 1.46 eV, 1.48 eV, and 1.51 eV, respectively.

With the decrease of  $E_g$ , the less energy required for electronic transitions, and the stronger the photo-Fenton reaction activity. Therefore,  $MCM_{535}$  exhibited excellent photo-Fenton and water evaporation performance.

Tab. S1. Concentrations of Cu, Fe and Mn ions in the precursor solution

| Molar ratio | Copper nitrate<br>(mol/L) | Iron nitrate<br>(mol/L) | Manganese nitrate<br>(mol/L) |
|-------------|---------------------------|-------------------------|------------------------------|
| 2:3:2       | 12.50                     | 18.75                   | 12.50                        |
| 3:3:3       | 18.75                     | 18.75                   | 18.75                        |
| 5:3:5       | 31.25                     | 18.75                   | 31.25                        |
| 6:3:6       | 37.50                     | 18.75                   | 37.50                        |
| 8:3:8       | 50.00                     | 18.75                   | 50.00                        |
| 9:3:9       | 56.25                     | 18.75                   | 56.25                        |

Tab. S2. Comparison of the evaporation rate and evaporation efficiency of our designed catalytic membrane with others previously reported in the literature.

| Material                                    | Light intensity<br>(kW·m <sup>-2</sup> ) | Evaporation rate<br>(kW·m <sup>-2</sup> ·h <sup>-1</sup> ) | Evaporation efficiency<br>(%) | Ref.             |
|---------------------------------------------|------------------------------------------|------------------------------------------------------------|-------------------------------|------------------|
| <b>MCM<sub>535</sub></b>                    | <b>1</b>                                 | <b>1.58</b>                                                | <b>90.4</b>                   | <b>This work</b> |
| MXene/cellulose                             | 1                                        | 1.44                                                       | 85.8                          | 1                |
| PVDF-HFP/PVA                                | 1                                        | 1.02                                                       | 72.0                          | 2                |
| Carbonaceous membrane                       | 1                                        | 1.33                                                       | 81.7                          | 3                |
| Ag/PANI                                     | 1                                        | 1.37                                                       | 84.7                          | 4                |
| CNT/PI                                      | 1                                        | 1.26                                                       | 72.7                          | 5                |
| rGO-CNT/PVDF                                | 1                                        | 1.22                                                       | 80.4                          | 6                |
| Fe <sub>3</sub> O <sub>4</sub> /carbon felt | 1                                        | 1.32                                                       | 85.0                          | 7                |
| Graphene/PPUS                               | 1                                        | 1.31                                                       | 85.3                          | 8                |
| Co-N-C/CF                                   | 1                                        | 1.88                                                       | 87.0                          | 9                |
| CB-MHGM/PI                                  | 1                                        | 1.49                                                       | 86.7                          | 10               |
| CB/PI                                       | 1                                        | 1.40                                                       | 80.2                          |                  |
| MoS <sub>2</sub> /Ti mesh                   | 1                                        | 1.44                                                       | 86.0                          | 11               |
| GTube membrane                              | 1                                        | 1.44                                                       | 77.0                          | 12               |

Noted: PVDF-HFP: poly(vinylidene fluoride-co-hexafluoropropylene) nanofibers, PVA: polyvinyl alcohol, PANI: polyaniline, CNT: carbon nanotube, PI: polyimide, rGO: reduced graphene oxide, PPUS: pyramid polyurethane sponge, Co-N-C: cobalt nanoparticles encapsulated in N-doped carbon framework, CF: carbon fiber, MHGM: modified hollow glass microspheres, CB: carbon black, and GTube: graphene tubes.

Tab. S3. The residual concentration of Cu, Fe and Mn ions in solution before and after photo-Fenton reaction.

|    | Initial concentration<br>in MCM <sub>535</sub><br>(mol/L) | Residual concentration in solution<br>(mol/L) |                       |
|----|-----------------------------------------------------------|-----------------------------------------------|-----------------------|
|    |                                                           | before                                        | after                 |
| Cu | 12.50                                                     | $3.59 \times 10^{-6}$                         | $6.33 \times 10^{-5}$ |
| Fe | 18.75                                                     | $4.69 \times 10^{-6}$                         | $2.32 \times 10^{-6}$ |
| Mn | 12.50                                                     | $4.51 \times 10^{-6}$                         | $6.37 \times 10^{-4}$ |

Tab. S4. Comparison of the degradation capability of our designed catalytic membrane with others previously reported in the literature.

| Material                                   | Degradation efficiency (%)       |                                  |                                  | Reacting time (min) | Ref.             |
|--------------------------------------------|----------------------------------|----------------------------------|----------------------------------|---------------------|------------------|
|                                            | RhB                              | BPA                              | OTC                              |                     |                  |
| <b>MCM<sub>535</sub></b>                   | <b>100</b> <sub>(200 mg/L)</sub> | <b>89.7</b> <sub>(40 mg/L)</sub> | <b>90.9</b> <sub>(40 mg/L)</sub> | <b>120</b>          | <b>This work</b> |
| CdS/Fe <sub>3</sub> O <sub>4</sub> @NPC    | 92.0 <sub>(20 mg/L)</sub>        | -                                | -                                | 75                  | 13               |
| MoS <sub>2</sub> /FeVO <sub>4</sub>        | 90.0 <sub>(10 mg/L)</sub>        | -                                | -                                | 120                 | 14               |
| LaFeO <sub>3</sub> /zeolites               | 98.3 <sub>(10 mg/L)</sub>        | -                                | -                                | 90                  | 15               |
| $\alpha$ -FeOOH/BiOI                       | 100 <sub>(20 mg/L)</sub>         | -                                | -                                | 20                  | 16               |
| Mn@ peroxymonosulfate                      | -                                | 89.1 <sub>(15 mg/L)</sub>        | -                                | 60                  | 17               |
| Fe-O-Zr@MOF                                | -                                | 97.0 <sub>(10 mg/L)</sub>        | -                                | 30                  | 18               |
| PANI/MIL-88A(Fe)                           | -                                | 100 <sub>(10 mg/L)</sub>         | -                                | 60                  | 19               |
| MIL-88A                                    | -                                | 100 <sub>(10 mg/L)</sub>         | -                                | 120                 | 20               |
| g-C <sub>3</sub> N <sub>4</sub> /FeOOH     | -                                | -                                | 86.2 <sub>(20 mg/L)</sub>        | 120                 | 21               |
| Bi <sub>2</sub> WO <sub>6</sub> /CoAl-LDHs | -                                | -                                | 98.5 <sub>(10 mg/L)</sub>        | 60                  | 22               |
| OCN/MnFe <sub>2</sub> O <sub>4</sub>       | -                                | -                                | 82.2 <sub>(10 mg/L)</sub>        | 60                  | 23               |
| BiVO <sub>4</sub>                          | -                                | -                                | 83.0 <sub>(10 mg/L)</sub>        | 240                 | 24               |

Noted: NPC: N-doped C, MOF: metal-organic framework, PANI: polyaniline, MIL-88A: Fe-based MOF, and CoAl-LDH: CoAl layered double hydroxide.

## References

1. X. J. Zha, X. Zhao, J. H. Pu, L. S. Tang, K. Ke, R. Y. Bao, L. Bai, Z. Y. Liu, M. B. Yang and W. Yang, *ACS Appl. Mater. Interfaces.*, 2019, **11**, 36589-36597.
2. G. Xue, Q. Chen, S. Lin, J. Duan, P. Yang, K. Liu, J. Li and J. Zhou, *Glob. Chall.*, 2018, **2**, 1800001.
3. D. Wu, J. Liang, D. Zhang, C. Zhang and H. Zhu, *Sol. Energy Mat. Sol. C.*, 2020, 215, 110591.
4. R. Li, C. Zhou, L. Yang, J. Li, G. Zhang, J. Tian and W. Wu, *J. Hazard. Mater.* 2022, **424**, 127367.
5. X. Hou, R. Zhang and D. Fang, *Carbon*, 2022, 187, 310-320.
6. Y. Wang, C. Wang, X. Song, S. K. Megarajan and H. Jiang, *J. Mater. Chem. A*, 2018, **6**, 963-971.
7. Y. Geng, K. Zhang, K. Yang, P. Ying, L. Hu, J. Ding, J. Xue, W. Sun, K. Sun and M. Li, *Carbon*, 2019, **155**, 25-33.
8. Q. Yang, C. Xu, F. Wang, Z. Ling, Z. Zhang and X. Fang, *ACS Appl. Energy Mater.*, 2019, **2**, 7223-7232.
9. L. Cui, P. Wang, H. Che, X. Gao, J. Chen, B. Liu and Y. Ao, *Appl. Catal. B-Environ.*, 2023, **330**, 122556.
10. S. Wang, Y. Niu, L. Yan, W. Chan, Z. Zhu, H. Sun, J. Li, W. Liang and A. Li, *Compos. Sci. Technol.*, 2022, **228**, 109683.
11. Z. Chu, Z. Liu, Z. Li, Y. Cao, X. Tian, C. Jia, J. Wang, D. Wang, Z. Liu and W. Huang, *Mater. Today Sustain.*, 2022, **19**, 100223.
12. H. Yin, H. Xie, J. Liu, X. Zou and J. Liu, *Desalination*, 2021, **511**, 115116.
13. J. Zhang, L. Lin, B. Wang, Y. Zhang, Y. Wang, L. Zhang, Y. Jiang, H. Chen and M. Zhao, *Colloid. Surface. A.*, 2021, **625**, 126974.
14. Q. Liu, J. Zhao, Y. Wang, Y. Liu, J. Dong, J. Xia and H. Li, *Colloid. Surface. A.*, 2021, **623**, 126721.
15. T. T. N. Phan, A. N. Nikoloski, P. A. Bahri and D. Li, *J. Environ. Manage.*, 2019, **233**, 471-480.
16. Z.-H. Pan, Y. Wei, Q.-Y. Wang, K.-Y. Fan, J.-Y. Qi, S.-t. Wang and L.-Z. Zhang, *J. Environ. Chem. Eng.*, 2021, **9**, 106627.
17. Q. Si, W. Guo, B. Liu, H. Wang, S. Zheng, Q. Zhao, H. Luo, N. Ren and T. Yu, *Chem. Eng. J.*, 2022, **443**, 136399.
18. Z. Guan, S. Zhu, S. Ding, D. Xia and D. Li, *Chemosphere*, 2022, **299**, 134481.
19. D. D. Chen, X. H. Yi, L. Ling, C. C. Wang and P. Wang, *Appl. Organomet. Chem.*, 2020, **34**, 5795.
20. H. Fu, X.-X. Song, L. Wu, C. Zhao, P. Wang and C.-C. Wang, *Mater. Res. Bull.*, 2020, **125**, 110806.
21. W. Shi, W. Sun, Y. Liu, K. Zhang, H. Sun, X. Lin, Y. Hong and F. Guo, *J. Hazard. Mater.*, 2022, **436**, 129141.
22. B. Shao, Z. Liu, L. Tang, Q. Liang, Q. He, T. Wu, Y. Pan, M. Cheng, Y. Liu, X. Tan, J. Tang, H. Wang, H. Feng and S. Tong, *Chemosphere*, 2022, **291**, 133001.
23. H. Yi, C. Lai, X. Huo, L. Qin, Y. Fu, S. Liu, L. Li, M. Zhang, M. Chen and G. Zeng, *Environ. Sci-nano.*, 2022, **9**, 815-826.
24. T. Senasu, S. Youngme, K. Hemavibool and S. Nanan, *J. Solid. State. Chem.*, 2021, **297**, 122088.
